# Supplementary material for: Trophic Discrimination Factors of Stable Carbon and Nitrogen Isotopes in Hair of Corn Fed Wild Boar
Source: PubMed Central journal article supplement (PMC4411150; doi:10.1371/journal.pone.0125042), 2015-04-27
Supplement: pone.0125042.s001.pdf [file pone.0125042.s001.pdf]

**S1 Table.** Data on lengths (mm) of the shoulder and rump hair of individual wild boar collected at the first sampling period (i.e. 42 days after the shaving).

| Individual | Body location | Length | Individual | Body location | Length | Individual | Body location | Length |
|------------|---------------|--------|------------|---------------|--------|------------|---------------|--------|
| ind1       | rump          | 49     | ind2       | shoulder      | 42     | ind3       | shoulder      | 45     |
| ind1       | rump          | 43     | ind2       | shoulder      | 53     | ind3       | shoulder      | 48     |
| ind1       | rump          | 38     | ind2       | shoulder      | 46     | ind3       | shoulder      | 54     |
| ind1       | rump          | 43     | ind2       | shoulder      | 45     | ind3       | shoulder      | 52     |
| ind1       | rump          | 45     | ind2       | shoulder      | 40     | ind3       | shoulder      | 47     |
| ind1       | rump          | 40     | ind2       | shoulder      | 43     | ind3       | shoulder      | 52     |
| ind1       | rump          | 43     | ind2       | shoulder      | 53     | ind3       | shoulder      | 51     |
| ind1       | rump          | 44     | ind2       | shoulder      | 48     | ind3       | shoulder      | 48     |
| ind1       | rump          | 45     | ind2       | shoulder      | 47     | ind3       | shoulder      | 50     |
| ind1       | rump          | 39     | ind2       | shoulder      | 42     | ind3       | shoulder      | 53     |
| ind1       | rump          | 41     | ind2       | shoulder      | 50     | ind3       | shoulder      | 53     |
| ind1       | rump          | 42     | ind2       | shoulder      | 51     | ind3       | shoulder      | 48     |
| ind1       | rump          | 43     | ind2       | shoulder      | 45     | ind3       | shoulder      | 51     |
| ind1       | rump          | 51     | ind2       | shoulder      | 44     | ind3       | shoulder      | 50     |
| ind1       | rump          | 43     | ind2       | shoulder      | 40     | ind3       | shoulder      | 54     |
| ind1       | rump          | 49     | ind2       | shoulder      | 40     | ind3       | shoulder      | 46     |
| ind1       | rump          | 49     | ind2       | shoulder      | 54     | ind3       | shoulder      | 53     |
| ind1       | rump          | 48     | ind2       | shoulder      | 51     | ind3       | shoulder      | 46     |
| ind1       | rump          | 48     | ind2       | shoulder      | 47     | ind3       | shoulder      | 51     |
| ind1       | rump          | 50     | ind2       | shoulder      | 41     | ind3       | shoulder      | 50     |
| ind1       | rump          | 43     | ind2       | shoulder      | 39     | ind3       | shoulder      | 54     |
| ind1       | rump          | 46     | ind2       | shoulder      | 43     | ind3       | shoulder      | 49     |
| ind1       | rump          | 44     | ind2       | shoulder      | 39     | ind3       | shoulder      | 50     |
| ind1       | rump          | 40     | ind2       | shoulder      | 50     | ind3       | shoulder      | 52     |
| ind1       | rump          | 38     | ind2       | shoulder      | 51     | ind3       | shoulder      | 48     |
| ind1       | rump          | 45     | ind2       | shoulder      | 54     | ind3       | shoulder      | 51     |
| ind1       | rump          | 47     | ind2       | shoulder      | 43     | ind3       | shoulder      | 48     |
| ind1       | rump          | 40     | ind2       | shoulder      | 41     | ind3       | shoulder      | 45     |
| ind1       | rump          | 45     | ind2       | shoulder      | 52     | ind3       | shoulder      | 48     |
| ind1       | rump          | 42     | ind2       | shoulder      | 45     | ind3       | shoulder      | 50     |
| ind1       | rump          | 43     | ind2       | shoulder      | 39     | ind3       | shoulder      | 48     |
| ind1       | rump          | 46     | ind2       | shoulder      | 44     | ind3       | shoulder      | 56     |
| ind1       | rump          | 43     | ind2       | shoulder      | 45     | ind3       | shoulder      | 50     |
| ind1       | rump          | 41     | ind2       | shoulder      | 47     | ind3       | shoulder      | 53     |
| ind1       | rump          | 43     | ind2       | shoulder      | 43     | ind3       | shoulder      | 48     |
| ind1       | rump          | 40     | ind2       | shoulder      | 38     | ind3       | shoulder      | 51     |
| ind1       | rump          | 39     | ind2       | shoulder      | 44     | ind3       | shoulder      | 52     |
| ind1       | rump          | 43     | ind2       | shoulder      | 45     | ind3       | shoulder      | 47     |
| ind1       | rump          | 40     | ind2       | shoulder      | 40     | ind3       | shoulder      | 49     |
| ind1       | rump          | 39     | ind2       | shoulder      | 44     | ind3       | shoulder      | 50     |
| ind1       | rump          | 40     | ind2       | shoulder      | 40     | ind3       | shoulder      | 45     |
| ind1       | rump          | 43     | ind2       | shoulder      | 52     | ind3       | shoulder      | 49     |
| ind1       | rump          | 39     | ind2       | shoulder      | 39     | ind3       | shoulder      | 53     |
| ind1       | rump          | 43     | ind2       | shoulder      | 52     | ind3       | shoulder      | 52     |
| ind1       | rump          | 42     | ind2       | shoulder      | 50     | ind3       | shoulder      | 46     |
| ind1       | rump          | 36     | ind2       | shoulder      | 44     | ind3       | shoulder      | 49     |
| ind1       | rump          | 46     | ind2       | shoulder      | 39     | ind3       | shoulder      | 47     |
| ind1       | rump          | 42     | ind2       | shoulder      | 45     | ind3       | shoulder      | 52     |
| ind1       | rump          | 42     | ind2       | shoulder      | 52     | ind3       | shoulder      | 45     |
| ind1       | rump          | 38     | ind2       | shoulder      | 48     | ind3       | shoulder      | 60     |
| ind1       | shoulder      | 45     | ind2       | rump          | 42     | ind3       | rump          | 55     |
| ind1       | shoulder      | 48     | ind2       | rump          | 39     | ind3       | rump          | 56     |
| ind1       | shoulder      | 45     | ind2       | rump          | 49     | ind3       | rump          | 52     |
| ind1       | shoulder      | 49     | ind2       | rump          | 48     | ind3       | rump          | 43     |
| ind1       | shoulder      | 45     | ind2       | rump          | 48     | ind3       | rump          | 50     |
| ind1       | shoulder      | 43     | ind2       | rump          | 46     | ind3       | rump          | 46     |
| ind1       | shoulder      | 45     | ind2       | rump          | 39     | ind3       | rump          | 52     |
| ind1       | shoulder      | 50     | ind2       | rump          | 40     | ind3       | rump          | 54     |
| ind1       | shoulder      | 46     | ind2       | rump          | 50     | ind3       | rump          | 55     |
| ind1       | shoulder      | 53     | ind2       | rump          | 42     | ind3       | rump          | 44     |
| ind1       | shoulder      | 50     | ind2       | rump          | 49     | ind3       | rump          | 49     |

| <b>Individual</b> | <b>Body location</b> | <b>Length</b> | <b>Individual</b> | <b>Body location</b> | <b>Length</b> | <b>Individual</b> | <b>Body location</b> | <b>Length</b> |
|-------------------|----------------------|---------------|-------------------|----------------------|---------------|-------------------|----------------------|---------------|
| ind1              | shoulder             | 49            | ind2              | rump                 | 43            | ind3              | rump                 | 50            |
| ind1              | shoulder             | 47            | ind2              | rump                 | 47            | ind3              | rump                 | 54            |
| ind1              | shoulder             | 49            | ind2              | rump                 | 37            | ind3              | rump                 | 47            |
| ind1              | shoulder             | 50            | ind2              | rump                 | 43            | ind3              | rump                 | 45            |
| ind1              | shoulder             | 46            | ind2              | rump                 | 35            | ind3              | rump                 | 50            |
| ind1              | shoulder             | 45            | ind2              | rump                 | 38            | ind3              | rump                 | 51            |
| ind1              | shoulder             | 50            | ind2              | rump                 | 40            | ind3              | rump                 | 49            |
| ind1              | shoulder             | 49            | ind2              | rump                 | 45            | ind3              | rump                 | 46            |
| ind1              | shoulder             | 45            | ind2              | rump                 | 47            | ind3              | rump                 | 48            |
| ind1              | shoulder             | 46            | ind2              | rump                 | 42            | ind3              | rump                 | 53            |
| ind1              | shoulder             | 46            | ind2              | rump                 | 41            | ind3              | rump                 | 48            |
| ind1              | shoulder             | 47            | ind2              | rump                 | 36            | ind3              | rump                 | 51            |
| ind1              | shoulder             | 49            | ind2              | rump                 | 43            | ind3              | rump                 | 52            |
| ind1              | shoulder             | 47            | ind2              | rump                 | 40            | ind3              | rump                 | 48            |
| ind1              | shoulder             | 47            | ind2              | rump                 | 40            | ind3              | rump                 | 55            |
| ind1              | shoulder             | 48            | ind2              | rump                 | 38            | ind3              | rump                 | 43            |
| ind1              | shoulder             | 48            | ind2              | rump                 | 45            | ind3              | rump                 | 42            |
| ind1              | shoulder             | 46            | ind2              | rump                 | 48            | ind3              | rump                 | 54            |
| ind1              | shoulder             | 52            | ind2              | rump                 | 47            | ind3              | rump                 | 46            |
| ind1              | shoulder             | 50            | ind2              | rump                 | 45            | ind3              | rump                 | 50            |
| ind1              | shoulder             | 45            | ind2              | rump                 | 42            | ind3              | rump                 | 46            |
| ind1              | shoulder             | 52            | ind2              | rump                 | 44            | ind3              | rump                 | 52            |
| ind1              | shoulder             | 46            | ind2              | rump                 | 42            | ind3              | rump                 | 54            |
| ind1              | shoulder             | 50            | ind2              | rump                 | 35            | ind3              | rump                 | 55            |
| ind1              | shoulder             | 47            | ind2              | rump                 | 38            | ind3              | rump                 | 49            |
| ind1              | shoulder             | 45            | ind2              | rump                 | 40            | ind3              | rump                 | 45            |
| ind1              | shoulder             | 48            | ind2              | rump                 | 45            | ind3              | rump                 | 42            |
| ind1              | shoulder             | 50            | ind2              | rump                 | 37            | ind3              | rump                 | 44            |
| ind1              | shoulder             | 52            | ind2              | rump                 | 36            | ind3              | rump                 | 46            |
| ind1              | shoulder             | 50            | ind2              | rump                 | 43            | ind3              | rump                 | 55            |
| ind1              | shoulder             | 44            | ind2              | rump                 | 44            | ind3              | rump                 | 48            |
| ind1              | shoulder             | 46            | ind2              | rump                 | 42            | ind3              | rump                 | 43            |
| ind1              | shoulder             | 48            | ind2              | rump                 | 43            | ind3              | rump                 | 50            |
| ind1              | shoulder             | 50            | ind2              | rump                 | 40            | ind3              | rump                 | 57            |
| ind1              | shoulder             | 49            | ind2              | rump                 | 41            | ind3              | rump                 | 53            |
| ind1              | shoulder             | 47            | ind2              | rump                 | 47            | ind3              | rump                 | 50            |
| ind1              | shoulder             | 46            | ind2              | rump                 | 40            | ind3              | rump                 | 49            |
| ind1              | shoulder             | 47            | ind2              | rump                 | 45            | ind3              | rump                 | 45            |
| ind1              | shoulder             | 45            | ind2              | rump                 | 43            | ind3              | rump                 | 55            |
| ind4              | shoulder             | 47            | ind4              | shoulder             | 50            | ind4              | shoulder             | 48            |
| ind4              | shoulder             | 49            | ind4              | shoulder             | 49            | ind4              | shoulder             | 55            |
| ind4              | shoulder             | 46            | ind4              | shoulder             | 50            | ind4              | shoulder             | 49            |
| ind4              | shoulder             | 47            | ind4              | rump                 | 50            | ind4              | rump                 | 47            |
| ind4              | shoulder             | 51            | ind4              | rump                 | 48            | ind4              | rump                 | 46            |
| ind4              | shoulder             | 46            | ind4              | rump                 | 46            | ind4              | rump                 | 45            |
| ind4              | shoulder             | 47            | ind4              | rump                 | 51            | ind4              | rump                 | 47            |
| ind4              | shoulder             | 48            | ind4              | rump                 | 47            | ind4              | rump                 | 45            |
| ind4              | shoulder             | 50            | ind4              | rump                 | 48            | ind4              | rump                 | 46            |
| ind4              | shoulder             | 46            | ind4              | rump                 | 46            | ind4              | rump                 | 46            |
| ind4              | shoulder             | 51            | ind4              | rump                 | 45            | ind4              | rump                 | 47            |
| ind4              | shoulder             | 47            | ind4              | rump                 | 49            | ind4              | rump                 | 46            |
| ind4              | shoulder             | 46            | ind4              | rump                 | 49            | ind4              | rump                 | 45            |
| ind4              | shoulder             | 49            |                   |                      |               |                   |                      |               |
