# Supplementary material for: Trophic Discrimination Factors of Stable Carbon and Nitrogen Isotopes in Hair of Corn Fed Wild Boar
Source: PubMed Central journal article supplement (PMC4411150; doi:10.1371/journal.pone.0125042), 2015-04-27
Supplement: pone.0125042.s002.pdf [file pone.0125042.s002.pdf]

**S2 Table.** Data on stable carbon isotope ratios ( $\delta^{13}\text{C}$ ) and stable nitrogen isotope ratios ( $\delta^{15}\text{N}$ ) of the corn grain and hair samples of individual wild boar.

| <b>Hair samples</b> |                   |                      |                                         |                                         |
|---------------------|-------------------|----------------------|-----------------------------------------|-----------------------------------------|
|                     | <b>Individual</b> | <b>Body location</b> | <b><math>\delta^{15}\text{N}</math></b> | <b><math>\delta^{13}\text{C}</math></b> |
| <b>day 0-9</b>      | ind1              | rump                 | 8.1                                     | -18.0                                   |
|                     | ind1              | shoulder             | 8.0                                     | -18.6                                   |
|                     | ind2              | rump                 | 8.2                                     | -18.5                                   |
|                     | ind2              | shoulder             | 7.6                                     | -19.5                                   |
|                     | ind3              | shoulder             | 7.6                                     | -17.8                                   |
|                     | ind3              | rump                 | 7.5                                     | -18.8                                   |
|                     | ind4              | rump                 | 7.6                                     | -19.5                                   |
|                     | ind4              | shoulder             | 7.7                                     | -19.9                                   |
| <b>day 34-42</b>    | ind1              | rump                 | 7.9                                     | -14.1                                   |
|                     | ind1              | shoulder             | 7.8                                     | -14.2                                   |
|                     | ind2              | shoulder             | 7.6                                     | -14.9                                   |
|                     | ind2              | rump                 | 7.7                                     | -15.0                                   |
|                     | ind3              | shoulder             | 7.7                                     | -14.1                                   |
|                     | ind3              | rump                 | 7.7                                     | -14.2                                   |
|                     | ind4              | rump                 | 7.7                                     | -13.8                                   |
|                     | ind4              | shoulder             | 7.7                                     | -13.7                                   |
| <b>day 132-140</b>  | ind1              | rump                 | 8.0                                     | -14.5                                   |
|                     | ind1              | shoulder             | 7.8                                     | -14.6                                   |
|                     | ind2              | rump                 | 7.7                                     | -14.3                                   |
|                     | ind2              | shoulder             | 7.5                                     | -14.4                                   |
|                     | ind3              | rump                 | 7.8                                     | -14.6                                   |
|                     | ind3              | shoulder             | 7.6                                     | -14.3                                   |
|                     | ind4              | rump                 | 7.6                                     | -13.9                                   |
|                     | ind4              | shoulder             | 7.6                                     | -14.2                                   |
| <b>Corn grain</b>   |                   |                      |                                         |                                         |
|                     |                   |                      | <b><math>\delta^{15}\text{N}</math></b> | <b><math>\delta^{13}\text{C}</math></b> |
|                     |                   |                      | 4.0                                     | -12.0                                   |
|                     |                   |                      | 4.2                                     | -12.0                                   |
|                     |                   |                      | 4.2                                     | -12.0                                   |
|                     |                   |                      | 4.4                                     | -12.1                                   |

All values reported in ‰.
